# Supplementary material for: Syntheses, structures, and magnetic properties of cyano- and phenoxide-bridged Fe(iii)–Mn(iii) tetrameric assemblies formed by blocked fac-Fe tricyanide with aliphatic rings
Source: Royal Society of Chemistry journal article supplement (doi:10.1039/c3dt32563f), 2013-01-01
Supplement: c3dt32563f.pdf [file c3dt32563f.pdf]

## Supporting Information

Syntheses, Structures, and Magnetic Properties of Cyano- and Phenoxide-Bridged Fe(III)-Mn(III) Tetrameric Assemblies Formed by Blocked *fac*-Fe Tricyanide with Aliphatic Rings

Kyung Jin Cho,<sup>a</sup> Dae Won Ryu,<sup>a</sup> Kwang Soo Lim,<sup>a</sup> Woo Ram Lee,<sup>a</sup> Jin Wuk Lee,<sup>a</sup> Eui Kwan Koh,<sup>b</sup> and Chang Seop Hong\*<sup>a</sup>

<sup>a</sup>Department of Chemistry, Research Institute for Natural Sciences, Korea University, Seoul 136-713, Korea

<sup>b</sup>Nano-Bio System Research Team, Korea Basic Science Institute, Seoul 136-713, Korea

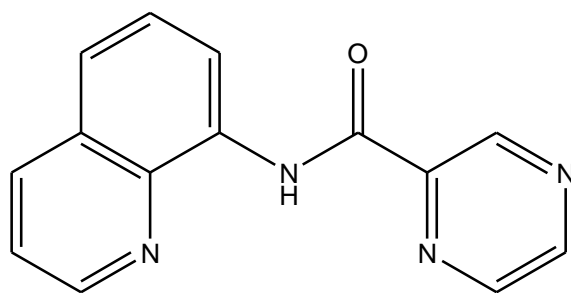

Hpzcq

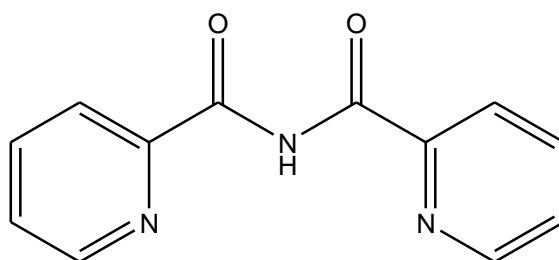

Hbpca

**Scheme S1.** Tridentate ligands.

**Table S1.** Crystallographic data for **1 – 3**

|                                         | <b>1</b>                                                                                                                      | <b>2</b>                                                                                                                      | <b>3</b>                                                                                                        |
|-----------------------------------------|-------------------------------------------------------------------------------------------------------------------------------|-------------------------------------------------------------------------------------------------------------------------------|-----------------------------------------------------------------------------------------------------------------|
| formula                                 | C <sub>86</sub> H <sub>92</sub> B <sub>2</sub> Cl <sub>4</sub> Fe <sub>2</sub> Mn <sub>2</sub> N <sub>22</sub> O <sub>4</sub> | C <sub>84</sub> H <sub>96</sub> B <sub>2</sub> Cl <sub>4</sub> Fe <sub>2</sub> Mn <sub>2</sub> N <sub>22</sub> O <sub>8</sub> | C <sub>88</sub> H <sub>108</sub> B <sub>2</sub> Fe <sub>2</sub> Mn <sub>2</sub> N <sub>22</sub> O <sub>12</sub> |
| Mr                                      | 1882.82                                                                                                                       | 1926.83                                                                                                                       | 1909.16                                                                                                         |
| T (K)                                   | 100                                                                                                                           | 100                                                                                                                           | 100                                                                                                             |
| crystal system                          | Triclinic                                                                                                                     | Monoclinic                                                                                                                    | Monoclinic                                                                                                      |
| space group                             | P-1                                                                                                                           | P2 <sub>1</sub> /c                                                                                                            | P2 <sub>1</sub> /c                                                                                              |
| a (Å)                                   | 12.711(3)                                                                                                                     | 9.6040(19)                                                                                                                    | 9.5060(19)                                                                                                      |
| b (Å)                                   | 13.004(3)                                                                                                                     | 14.817(3)                                                                                                                     | 15.152(3)                                                                                                       |
| c (Å)                                   | 15.439(3)                                                                                                                     | 30.988(6)                                                                                                                     | 31.398(6)                                                                                                       |
| α (°)                                   | 107.70(3)                                                                                                                     | 90                                                                                                                            | 90                                                                                                              |
| β (°)                                   | 101.74(3)                                                                                                                     | 93.56(3)                                                                                                                      | 92.33(3)                                                                                                        |
| γ (°)                                   | 112.78(3)                                                                                                                     | 90                                                                                                                            | 90                                                                                                              |
| V (Å <sup>3</sup> )                     | 2086.4(7)                                                                                                                     | 4401.2(15)                                                                                                                    | 4518.7(16)                                                                                                      |
| Z                                       | 1                                                                                                                             | 2                                                                                                                             | 2                                                                                                               |
| ρ <sub>calc</sub> (g cm <sup>-3</sup> ) | 1.498                                                                                                                         | 1.454                                                                                                                         | 1.403                                                                                                           |
| μ (mm <sup>-1</sup> )                   | 0.832                                                                                                                         | 0.794                                                                                                                         | 0.661                                                                                                           |
| F(000)                                  | 974                                                                                                                           | 1996                                                                                                                          | 1996                                                                                                            |
| reflections collected                   | 6175                                                                                                                          | 26835                                                                                                                         | 8642                                                                                                            |
| GOF                                     | 1.036                                                                                                                         | 1.056                                                                                                                         | 1.026                                                                                                           |
| R1 <sup>a</sup> (I ≥ 2σ(I))             | 0.0724                                                                                                                        | 0.0615                                                                                                                        | 0.0589                                                                                                          |
| wR2 <sup>b</sup> (I ≥ 2σ(I))            | 0.1989                                                                                                                        | 0.1576                                                                                                                        | 0.1464                                                                                                          |

$${}^a\text{R1} = \frac{\sum ||F_o| - F_c|}{\sum |F_c|}, \quad {}^b\text{wR2} = \left[ \frac{\sum w(F_o^2 - F_c^2)^2}{\sum w(F_o^2)^2} \right]^{1/2}.$$

**Table S2.** Bond lengths (Å) and angles (°) for **1 - 3<sup>a</sup>**

| <b>1</b>         |          |                   |            |
|------------------|----------|-------------------|------------|
| Fe(1)-C(1)       | 1.909(7) | N(1)-Mn(1)        | 2.210(6)   |
| Fe(1)-C(2)       | 1.936(8) | Mn(1)-O(2)        | 1.847(5)   |
| Fe(1)-C(3)       | 1.973(8) | Mn(1)-O(1)        | 1.897(4)   |
| Fe(1)-N(6)       | 1.981(6) | Mn(1)-N(11)       | 1.986(6)   |
| Fe(1)-N(8)       | 2.007(6) | Mn(1)-N(10)       | 1.990(6)   |
| Fe(1)-N(4)       | 2.037(6) | Mn(1)-O(1)a       | 2.505(4)   |
| O(1)-Mn(1)a      | 2.505(4) |                   |            |
|                  |          |                   |            |
| C(1)-Fe(1)-C(2)  | 84.7(3)  | N(9)-N(8)-Fe(1)   | 117.0(4)   |
| C(1)-Fe(1)-C(3)  | 87.9(3)  | O(2)-Mn(1)-O(1)   | 95.0(2)    |
| C(2)-Fe(1)-C(3)  | 83.6(3)  | O(2)-Mn(1)-N(11)  | 91.1(2)    |
| C(1)-Fe(1)-N(6)  | 93.0(3)  | O(1)-Mn(1)-N(11)  | 162.7(2)   |
| C(2)-Fe(1)-N(6)  | 94.0(3)  | O(2)-Mn(1)-N(10)  | 174.6(2)   |
| C(3)-Fe(1)-N(6)  | 177.4(3) | O(1)-Mn(1)-N(10)  | 89.5(2)    |
| C(1)-Fe(1)-N(8)  | 91.3(3)  | N(11)-Mn(1)-N(10) | 85.5(2)    |
| C(2)-Fe(1)-N(8)  | 174.6(3) | O(2)-Mn(1)-N(1)   | 93.5(2)    |
| C(3)-Fe(1)-N(8)  | 92.7(3)  | O(1)-Mn(1)-N(1)   | 98.8(2)    |
| N(6)-Fe(1)-N(8)  | 89.7(2)  | N(11)-Mn(1)-N(1)  | 97.0(2)    |
| C(1)-Fe(1)-N(4)  | 177.6(3) | N(10)-Mn(1)-N(1)  | 82.9(2)    |
| C(2)-Fe(1)-N(4)  | 93.4(3)  | O(2)-Mn(1)-O(1)a  | 87.11(19)  |
| C(3)-Fe(1)-N(4)  | 90.5(3)  | O(1)-Mn(1)-O(1)a  | 77.64(19)  |
| N(6)-Fe(1)-N(4)  | 88.5(2)  | N(11)-Mn(1)-O(1)a | 86.47(19)  |
| N(8)-Fe(1)-N(4)  | 90.5(2)  | N(10)-Mn(1)-O(1)a | 96.8(2)    |
| N(1)-C(1)-Fe(1)  | 178.6(6) | N(1)-Mn(1)-O(1)a  | 176.43(18) |
| N(2)-C(2)-Fe(1)  | 176.2(6) | C(29)-N(10)-Mn(1) | 125.7(5)   |
| N(3)-C(3)-Fe(1)  | 177.6(6) | C(26)-N(10)-Mn(1) | 111.6(4)   |
| C(1)-N(1)-Mn(1)  | 159.1(6) | C(37)-N(11)-Mn(1) | 128.4(5)   |
| C(5)-N(4)-N(5)   | 107.5(5) | C(27)-N(11)-Mn(1) | 109.5(4)   |
| C(5)-N(4)-Fe(1)  | 136.1(5) | C(35)-O(1)-Mn(1)  | 118.1(4)   |
| N(5)-N(4)-Fe(1)  | 116.1(4) | C(35)-O(1)-Mn(1)a | 127.4(4)   |
| C(12)-N(6)-Fe(1) | 135.8(5) | Mn(1)-O(1)-Mn(1)a | 102.36(19) |
| N(7)-N(6)-Fe(1)  | 117.3(4) | C(43)-O(2)-Mn(1)  | 127.4(5)   |

C(19)–N(8)–Fe(1) 136.4(4)

**2**

Fe(1)–C(1) 1.904(4)

N(1)–Mn(1) 2.172(3)

Fe(1)–C(3) 1.922(4)

Mn(1)–O(2) 1.865(3)

Fe(1)–C(2) 1.934(4)

Mn(1)–O(1) 1.913(2)

Fe(1)–N(4) 1.974(3)

Mn(1)–N(11) 1.985(3)

Fe(1)–N(8) 1.994(3)

Mn(1)–N(10) 1.988(3)

Fe(1)–N(6) 2.013(3)

Mn(1)–O(1)b 2.482(3)

O(1)–Mn(1)b 2.482(3)

C(1)–Fe(1)–C(3) 85.84(16)

N(9)–N(8)–Fe(1) 116.8(2)

C(1)–Fe(1)–C(2) 82.83(15)

O(2)–Mn(1)–O(1) 97.01(11)

C(3)–Fe(1)–C(2) 91.20(16)

O(2)–Mn(1)–N(11) 90.70(11)

C(1)–Fe(1)–N(4) 95.40(14)

O(1)–Mn(1)–N(11) 164.32(11)

C(3)–Fe(1)–N(4) 89.49(15)

O(2)–Mn(1)–N(10) 170.85(11)

C(2)–Fe(1)–N(4) 178.04(15)

O(1)–Mn(1)–N(10) 88.38(11)

C(1)–Fe(1)–N(8) 93.48(15)

N(11)–Mn(1)–N(10) 82.37(12)

C(3)–Fe(1)–N(8) 178.03(15)

O(2)–Mn(1)–N(1) 96.62(12)

C(2)–Fe(1)–N(8) 90.55(14)

O(1)–Mn(1)–N(1) 93.71(11)

N(4)–Fe(1)–N(8) 88.73(13)

N(11)–Mn(1)–N(1) 98.96(12)

C(1)–Fe(1)–N(6) 172.66(14)

N(10)–Mn(1)–N(1) 90.37(12)

C(3)–Fe(1)–N(6) 89.22(15)

O(2)–Mn(1)–O(1)b 92.80(10)

C(2)–Fe(1)–N(6) 91.86(15)

O(1)–Mn(1)–O(1)b 81.09(10)

N(4)–Fe(1)–N(6) 89.98(13)

N(11)–Mn(1)–O(1)b 84.93(10)

N(8)–Fe(1)–N(6) 91.63(13)

N(10)–Mn(1)–O(1)b 80.70(10)

N(3)–C(3)–Fe(1) 177.7(3)

N(1)–Mn(1)–O(1)b 169.75(10)

N(2)–C(2)–Fe(1) 175.1(3)

C(33)–O(1)–Mn(1) 121.9(2)

N(1)–C(1)–Fe(1) 173.3(3)

C(33)–O(1)–Mn(1)b 114.0(2)

C(1)–N(1)–Mn(1) 159.2(3)

Mn(1)–O(1)–Mn(1)b 98.91(10)

C(5)–N(4)–Fe(1) 135.3(2)

C(40)–O(2)–Mn(1) 130.4(2)

N(5)–N(4)–Fe(1) 116.6(2)

C(27)–N(10)–Mn(1) 125.2(3)

C(12)–N(6)–Fe(1) 134.5(3)

C(26)–N(10)–Mn(1) 112.4(2)

N(7)–N(6)–Fe(1) 117.6(2)

C(34)–N(11)–Mn(1) 127.4(3)

C(19)–N(8)–Fe(1) 136.4(3)

C(25)–N(11)–Mn(1) 112.9(2)

**3**

Fe(1)–C(1) 1.903(8)

N(1)–Mn(1) 2.178(6)

|                  |           |                   |            |
|------------------|-----------|-------------------|------------|
| Fe(1)–C(2)       | 1.905(6)  | Mn(1)–O(2)        | 1.860(3)   |
| Fe(1)–C(3)       | 1.906(6)  | Mn(1)–O(1)        | 1.899(4)   |
| Fe(1)–N(6)       | 1.968(4)  | Mn(1)–N(10)       | 1.982(4)   |
| Fe(1)–N(4)       | 1.988(5)  | Mn(1)–N(11)       | 1.984(4)   |
| Fe(1)–N(8)       | 2.008(5)  | Mn(1)–O(1)c       | 2.497(4)   |
| O(1)–Mn(1)c      | 2.497(4)  |                   |            |
|                  |           |                   |            |
| C(1)–Fe(1)–C(2)  | 85.7(2)   | N(9)–N(8)–Fe(1)   | 118.1(3)   |
| C(1)–Fe(1)–C(3)  | 82.8(2)   | O(2)–Mn(1)–O(1)   | 96.37(15)  |
| C(2)–Fe(1)–C(3)  | 91.8(2)   | O(2)–Mn(1)–N(10)  | 90.72(16)  |
| C(1)–Fe(1)–N(6)  | 95.6(2)   | O(1)–Mn(1)–N(10)  | 163.98(18) |
| C(2)–Fe(1)–N(6)  | 90.0(2)   | O(2)–Mn(1)–N(11)  | 171.00(17) |
| C(3)–Fe(1)–N(6)  | 177.5(2)  | O(1)–Mn(1)–N(11)  | 88.66(16)  |
| C(1)–Fe(1)–N(4)  | 93.9(2)   | N(10)–Mn(1)–N(11) | 82.60(18)  |
| C(2)–Fe(1)–N(4)  | 178.0(2)  | O(2)–Mn(1)–N(1)   | 96.36(17)  |
| C(3)–Fe(1)–N(4)  | 90.1(2)   | O(1)–Mn(1)–N(1)   | 94.27(17)  |
| N(6)–Fe(1)–N(4)  | 88.08(18) | N(10)–Mn(1)–N(1)  | 99.21(19)  |
| C(1)–Fe(1)–N(8)  | 172.1(2)  | N(11)–Mn(1)–N(1)  | 90.69(18)  |
| C(2)–Fe(1)–N(8)  | 88.9(2)   | O(2)–Mn(1)–O(1)c  | 94.00(15)  |
| C(3)–Fe(1)–N(8)  | 91.6(2)   | O(1)–Mn(1)–O(1)c  | 80.82(14)  |
| N(6)–Fe(1)–N(8)  | 90.20(19) | N(10)–Mn(1)–O(1)c | 84.38(16)  |
| N(4)–Fe(1)–N(8)  | 91.74(19) | N(11)–Mn(1)–O(1)c | 79.39(16)  |
| N(1)–C(1)–Fe(1)  | 173.5(5)  | N(1)–Mn(1)–O(1)c  | 168.97(14) |
| N(2)–C(2)–Fe(1)  | 177.6(5)  | C(27)–N(10)–Mn(1) | 127.2(4)   |
| N(3)–C(3)–Fe(1)  | 175.2(5)  | C(26)–N(10)–Mn(1) | 112.9(3)   |
| C(1)–N(1)–Mn(1)  | 158.4(4)  | C(34)–N(11)–Mn(1) | 125.9(4)   |
| C(5)–N(4)–N(5)   | 106.7(4)  | C(25)–N(11)–Mn(1) | 112.1(3)   |
| C(5)–N(4)–Fe(1)  | 136.7(4)  | C(33)–O(2)–Mn(1)  | 130.6(3)   |
| N(5)–N(4)–Fe(1)  | 116.5(3)  | C(40)–O(1)–Mn(1)  | 121.5(3)   |
| C(12)–N(6)–Fe(1) | 135.3(4)  | C(40)–O(1)–Mn(1)c | 112.0(3)   |
| N(7)–N(6)–Fe(1)  | 117.1(3)  | Mn(1)–O(1)–Mn(1)c | 99.18(14)  |
| C(19)–N(8)–Fe(1) | 135.3(4)  |                   |            |

<sup>a</sup>Symmetry transformations used to generate equivalent atoms: (a)  $-x, -y+1, -z+1$ ; (b)  $-x, -y+1, -z$ ; (c)  $-x, -y+1, -z$ .

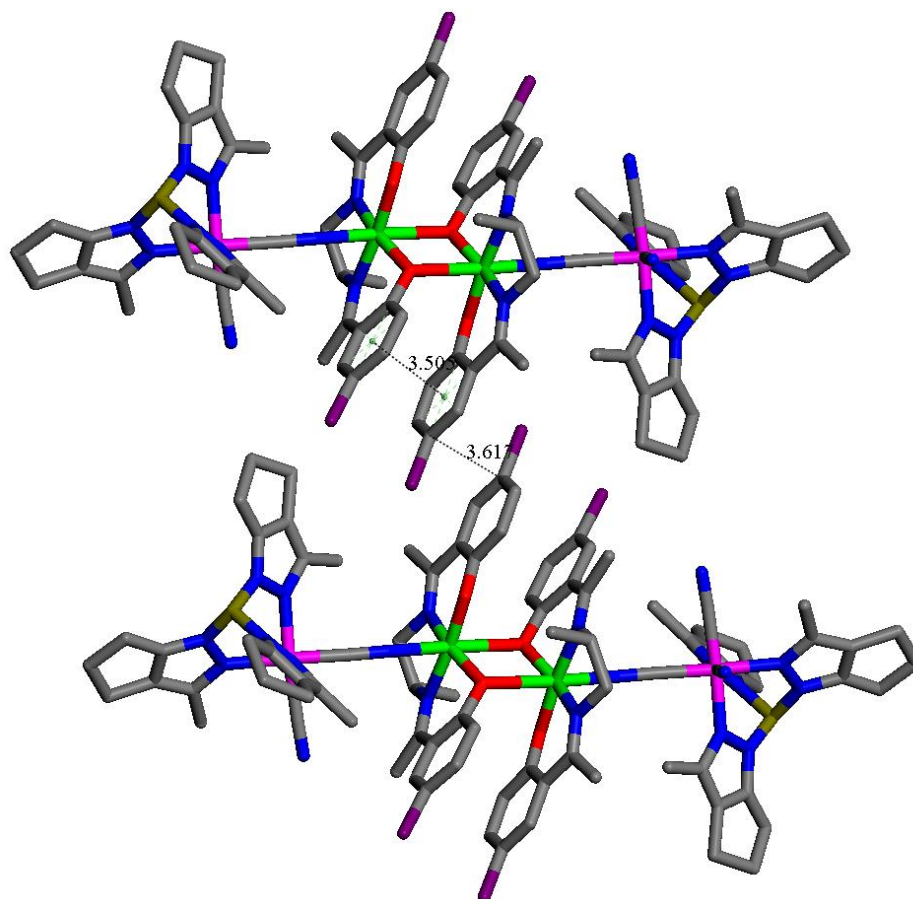

**Figure S1.** Extended structure of **1** showing  $\pi$ - $\pi$  interactions between benzene rings of Schiff bases ligands (centroid distance = 3.505 Å) and a weak  $\pi$ - $\pi$  contact between single C atoms with a distance of 3.617 Å.

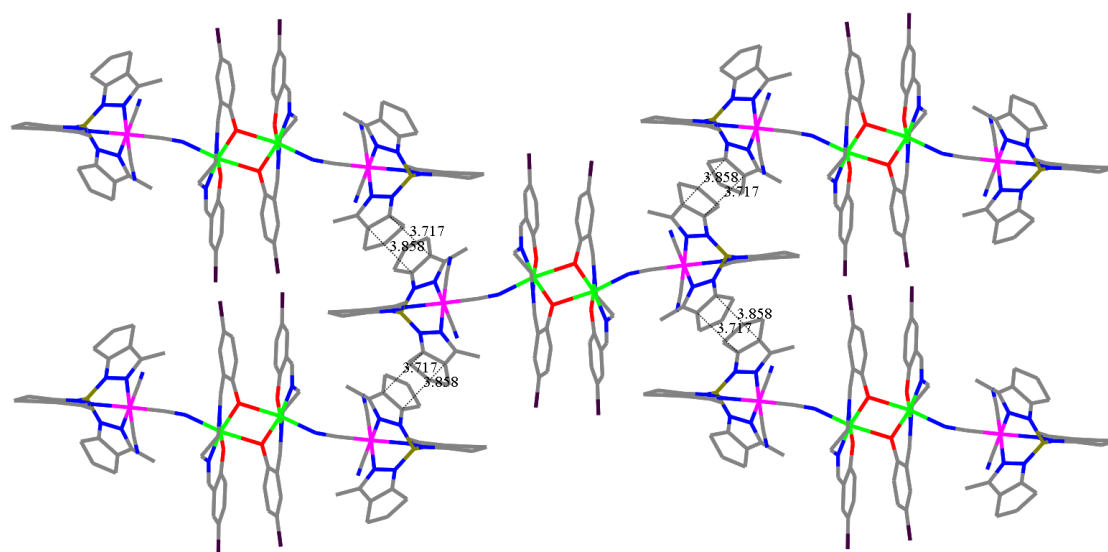

**Figure S2.** Extended structure of **2** showing  $\pi$ - $\pi$  interactions between pyrazole C atoms of  $\text{Tp}^{\text{Me,mt}^3}$  ligands (C...C = 3.717 and 3.858 Å). The shortest Fe-Fe distance is 9.358 Å through the intermolecular contact.

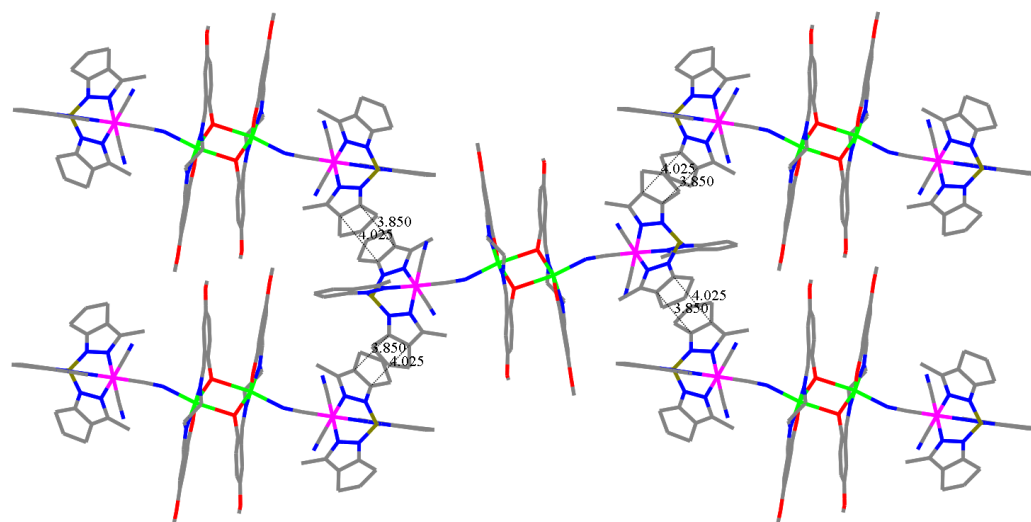

**Figure S3.** Extended structure of **3** showing  $\pi$ - $\pi$  interactions between pyrazole C atoms of  $\text{Tp}^{\text{Me,mt}^3}$  ligands (C...C = 3.850 and 4.025 Å). The shortest Fe-Fe distance is 9.612 Å through the intermolecular contact.



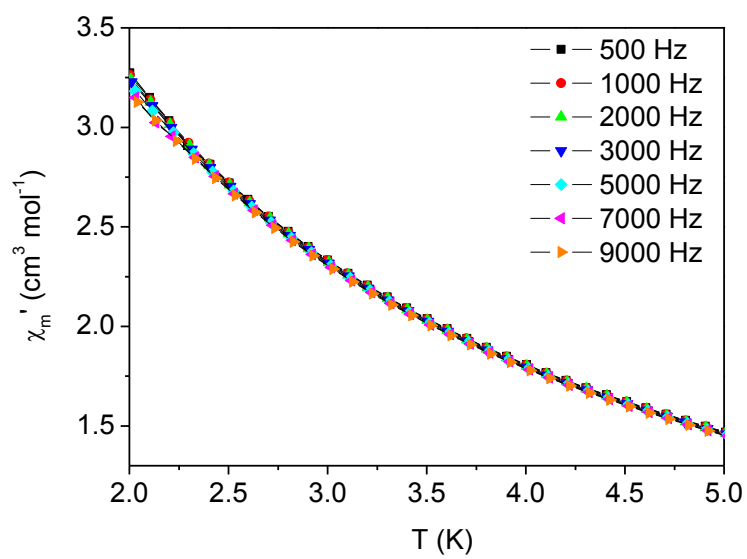

**Figure S4.** Plots of  $\chi_m'$  versus  $T$  for **1** at indicated frequencies.

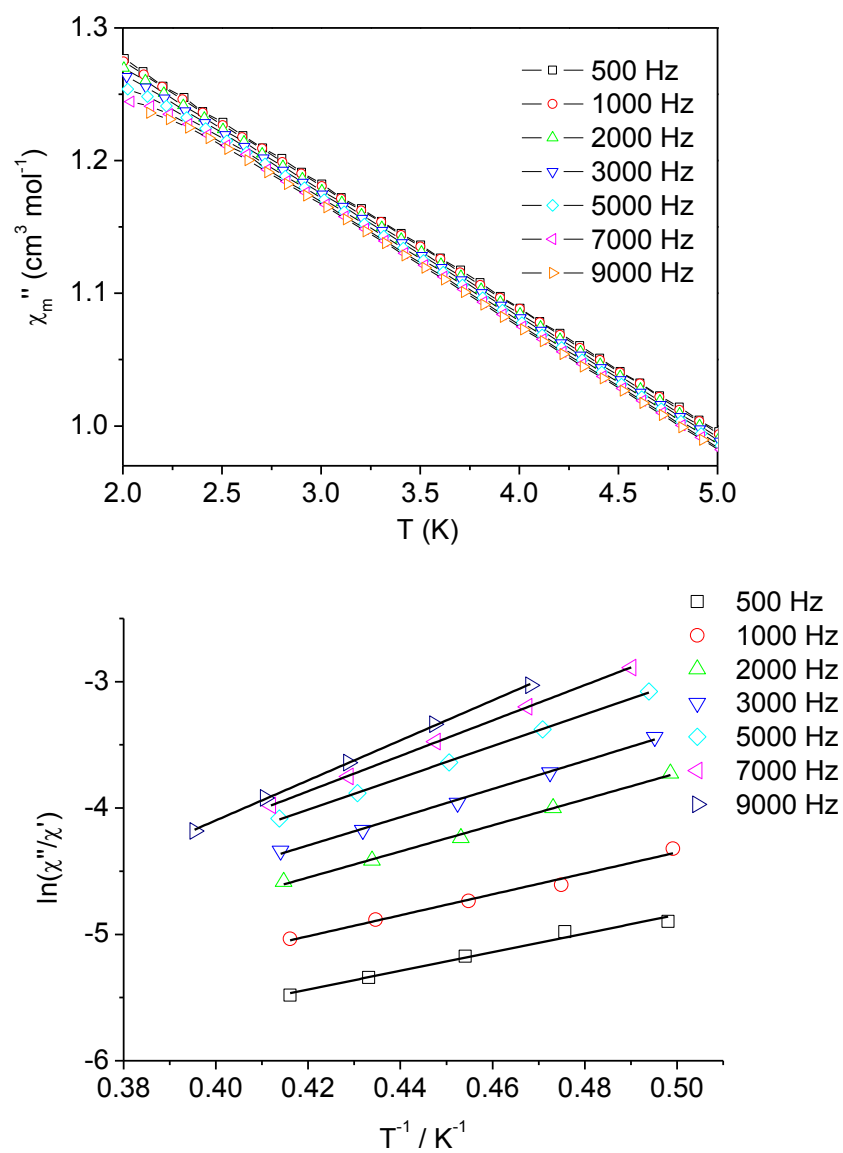

**Figure S5.** Plots of  $\chi_m''$  versus  $T$  (top) and natural logarithm of the ratio of  $\chi_m''$  to  $\chi_m'$  versus  $1/T$  for **2** (bottom).

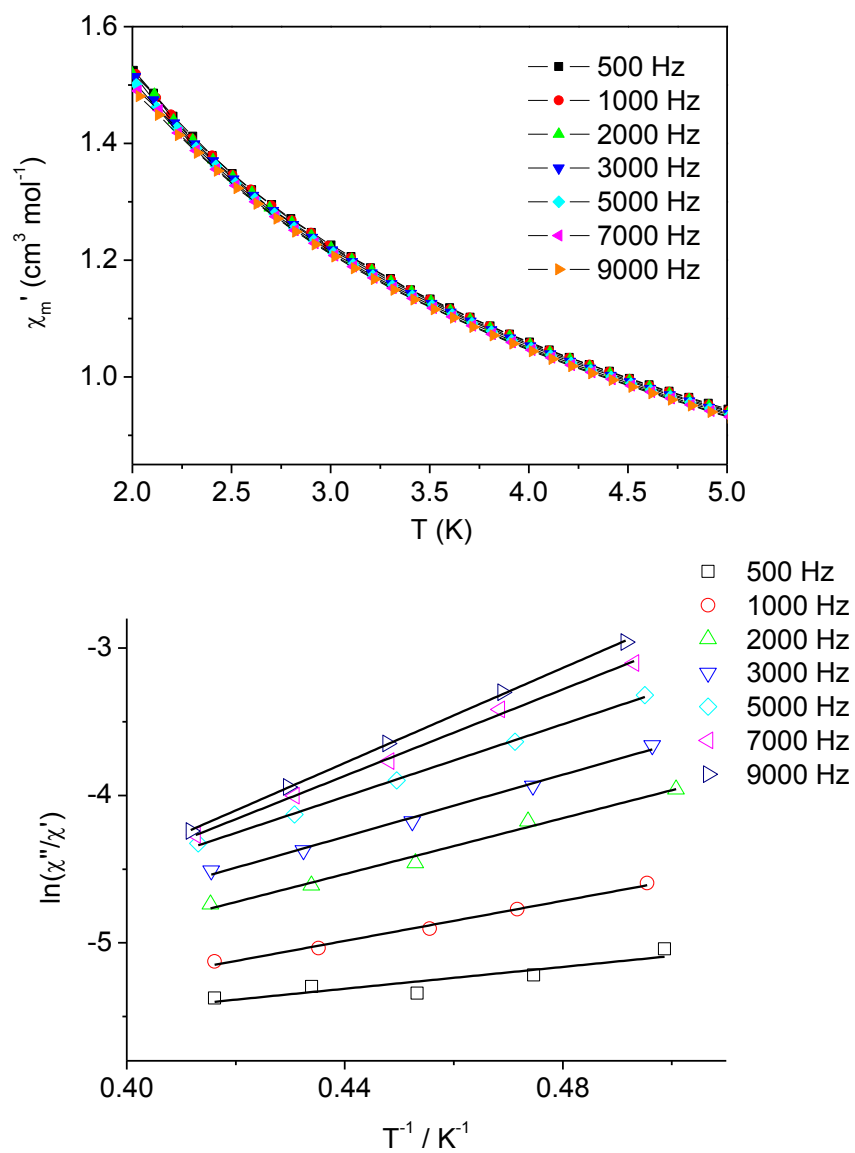

**Figure S6.** Plots of  $\chi_m'$  versus  $T$  (top) and natural logarithm of the ratio of  $\chi_m''$  to  $\chi_m'$  versus  $1/T$  for **3** (bottom).

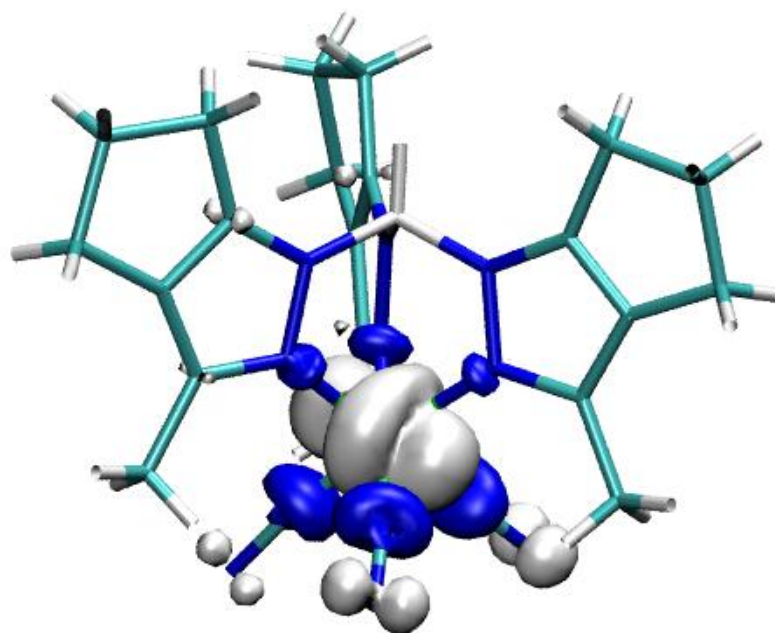

**Figure S7.** Spin density of the  $[(\text{Tp}^{\text{Me,mt3}})\text{Fe}(\text{CN})_3]^-$  precursor with a Fe  $d_{22}$  type magnetic orbital, derived from B3LYP DFT calculations performed with Gaussian 09. The 6-311G\* basis set is used for Fe and the 6-31G(d, p) basis set is taken for the other atoms.
